# Supplementary material for: New Viral Sequences Identified in the Flavescence Dorée Phytoplasma Vector Scaphoideus titanus
Source: MDPI journal article supplement (doi:10.3390/v12030287), 2020-03-06

Sequence length (bp)

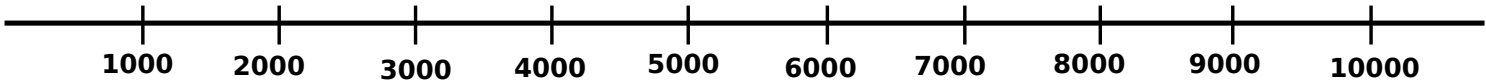

Scaphoideus titanus iflavirus 1

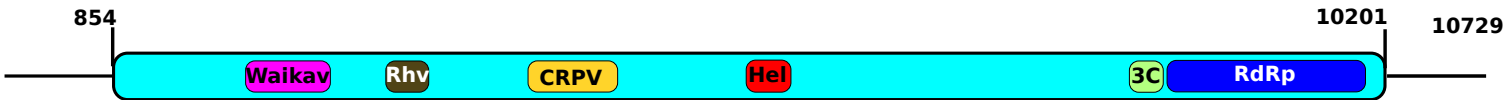

Scaphoideus titanus iflavirus 2

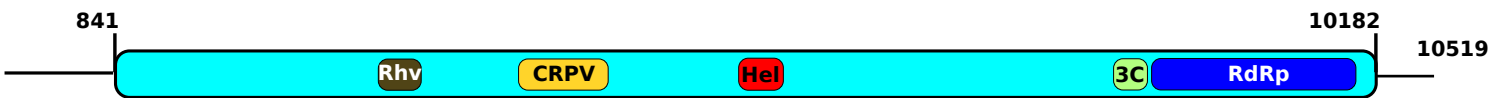

Scaphoideus titanus sobemo-like virus 1

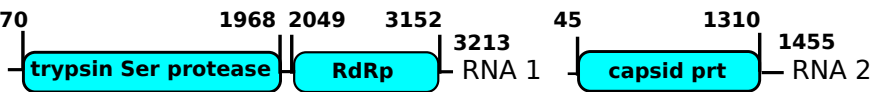

Scaphoideus titanus sobemo-like virus 2

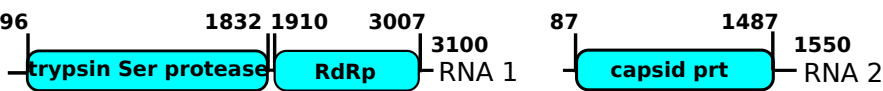

Scaphoideus titanus bunya-like virus 1

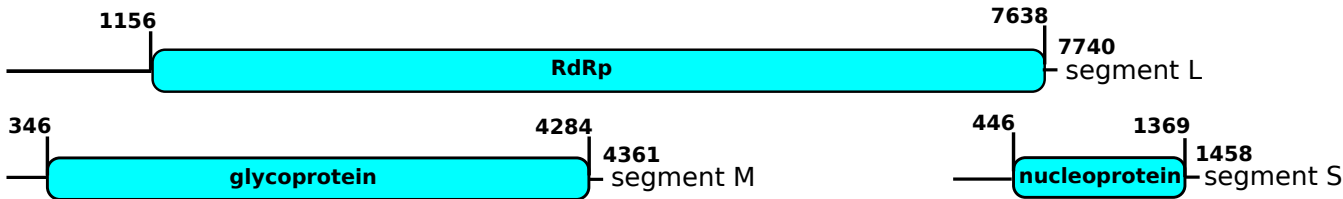

Scaphoideus titanus reo-like virus 1

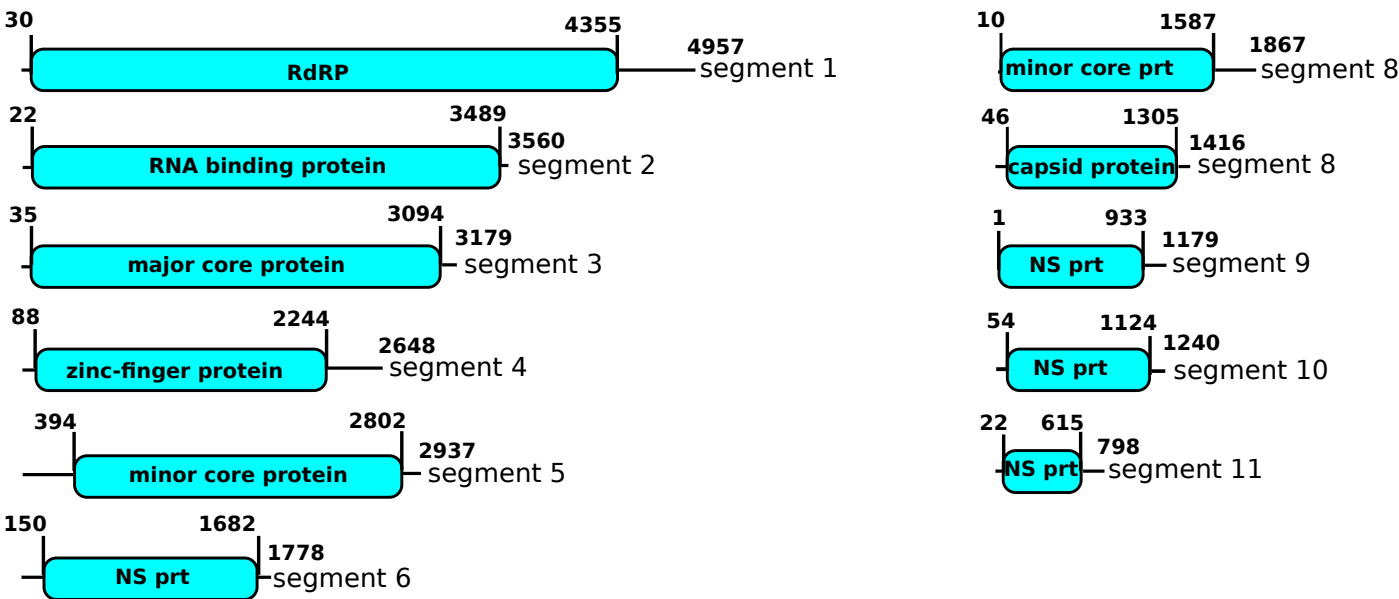

Scaphoideus titanus-associated partiti-like virus 1

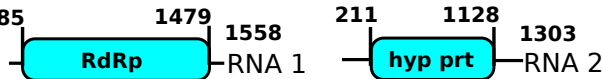

Supplement: s1 [file s1]
