# Supplementary figures and images for: New Viral Sequences Identified in the Flavescence Dorée Phytoplasma Vector Scaphoideus titanus
Source: MDPI journal article supplement (doi:10.3390/v12030287), 2020-03-06

# S1

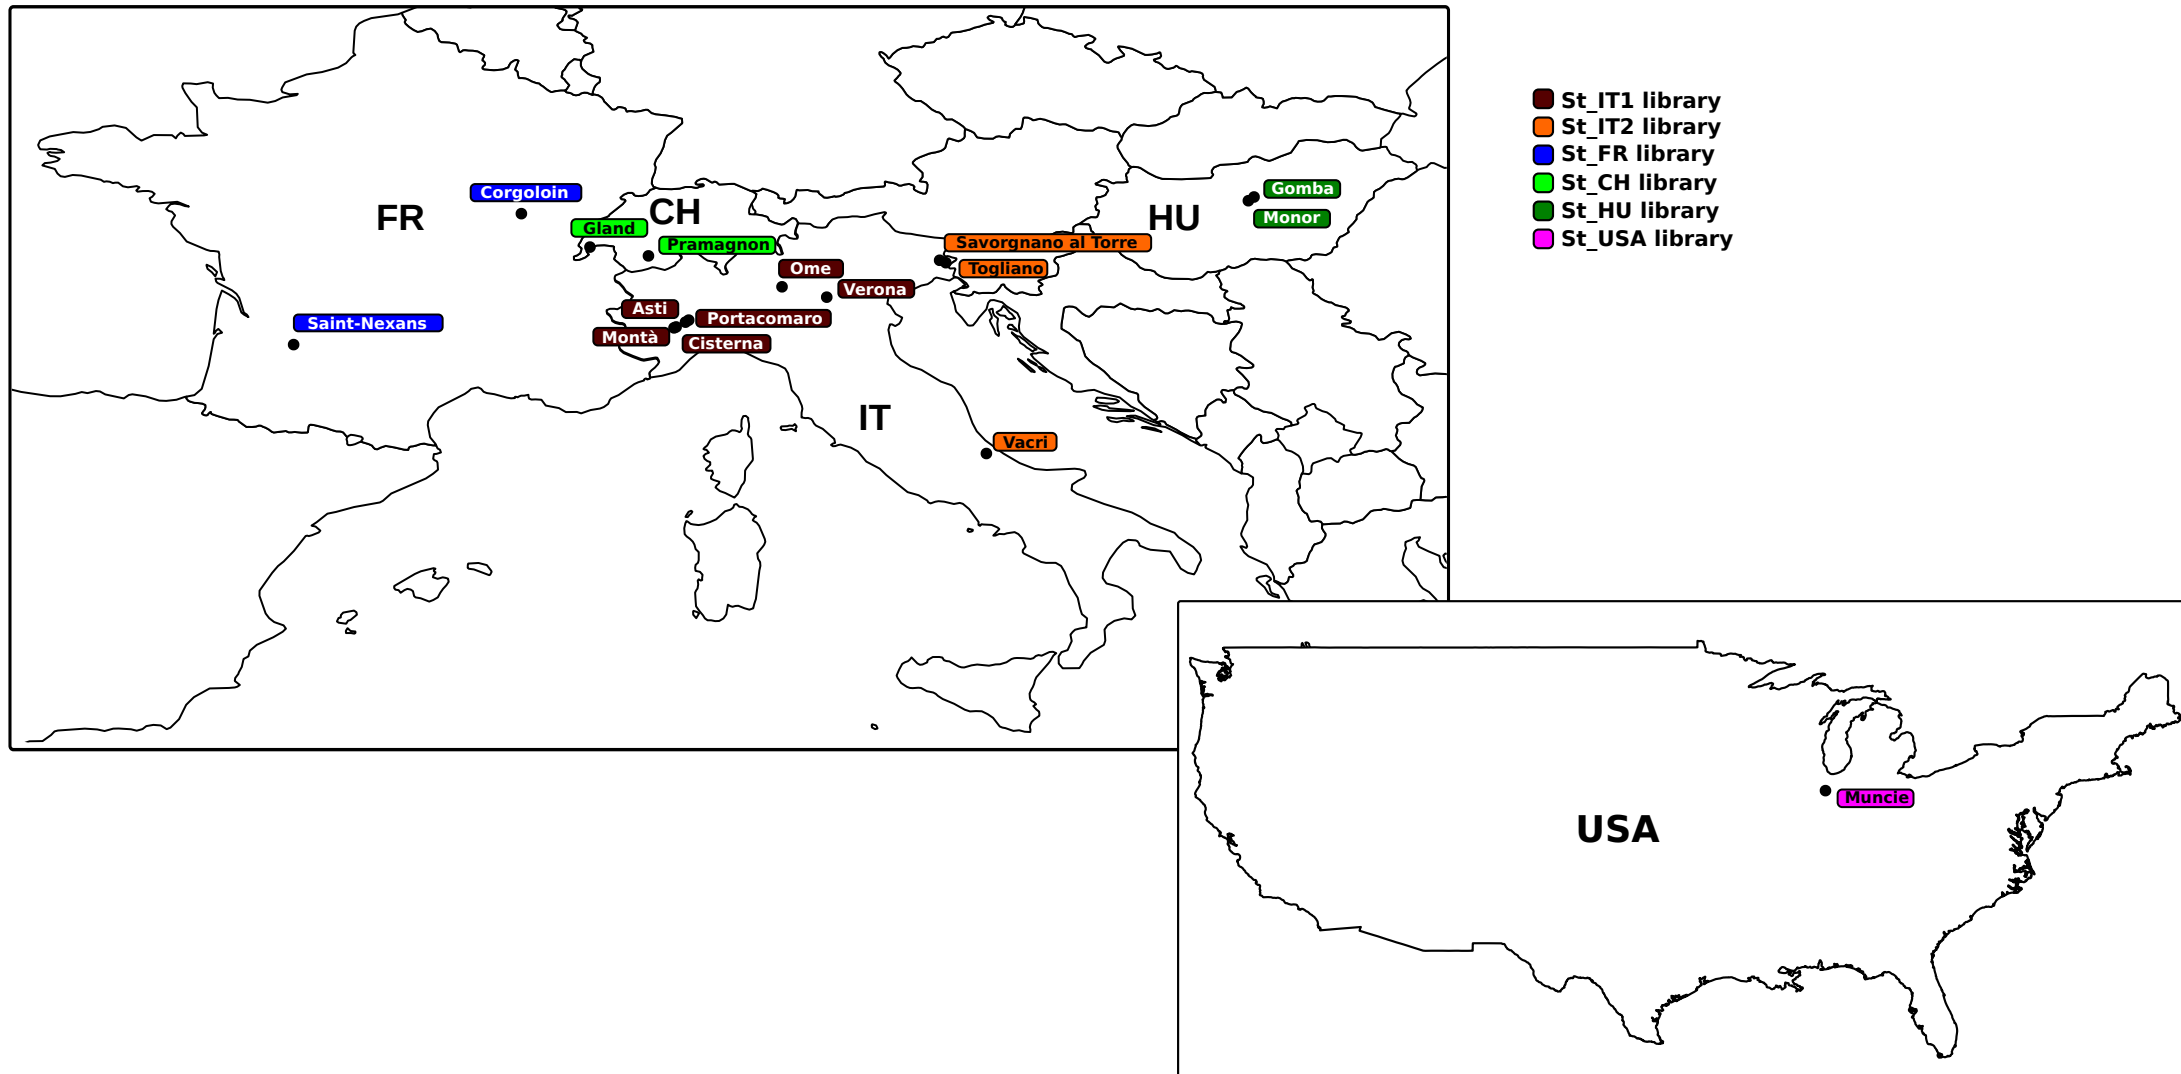

Supplement: s1 [file s1]

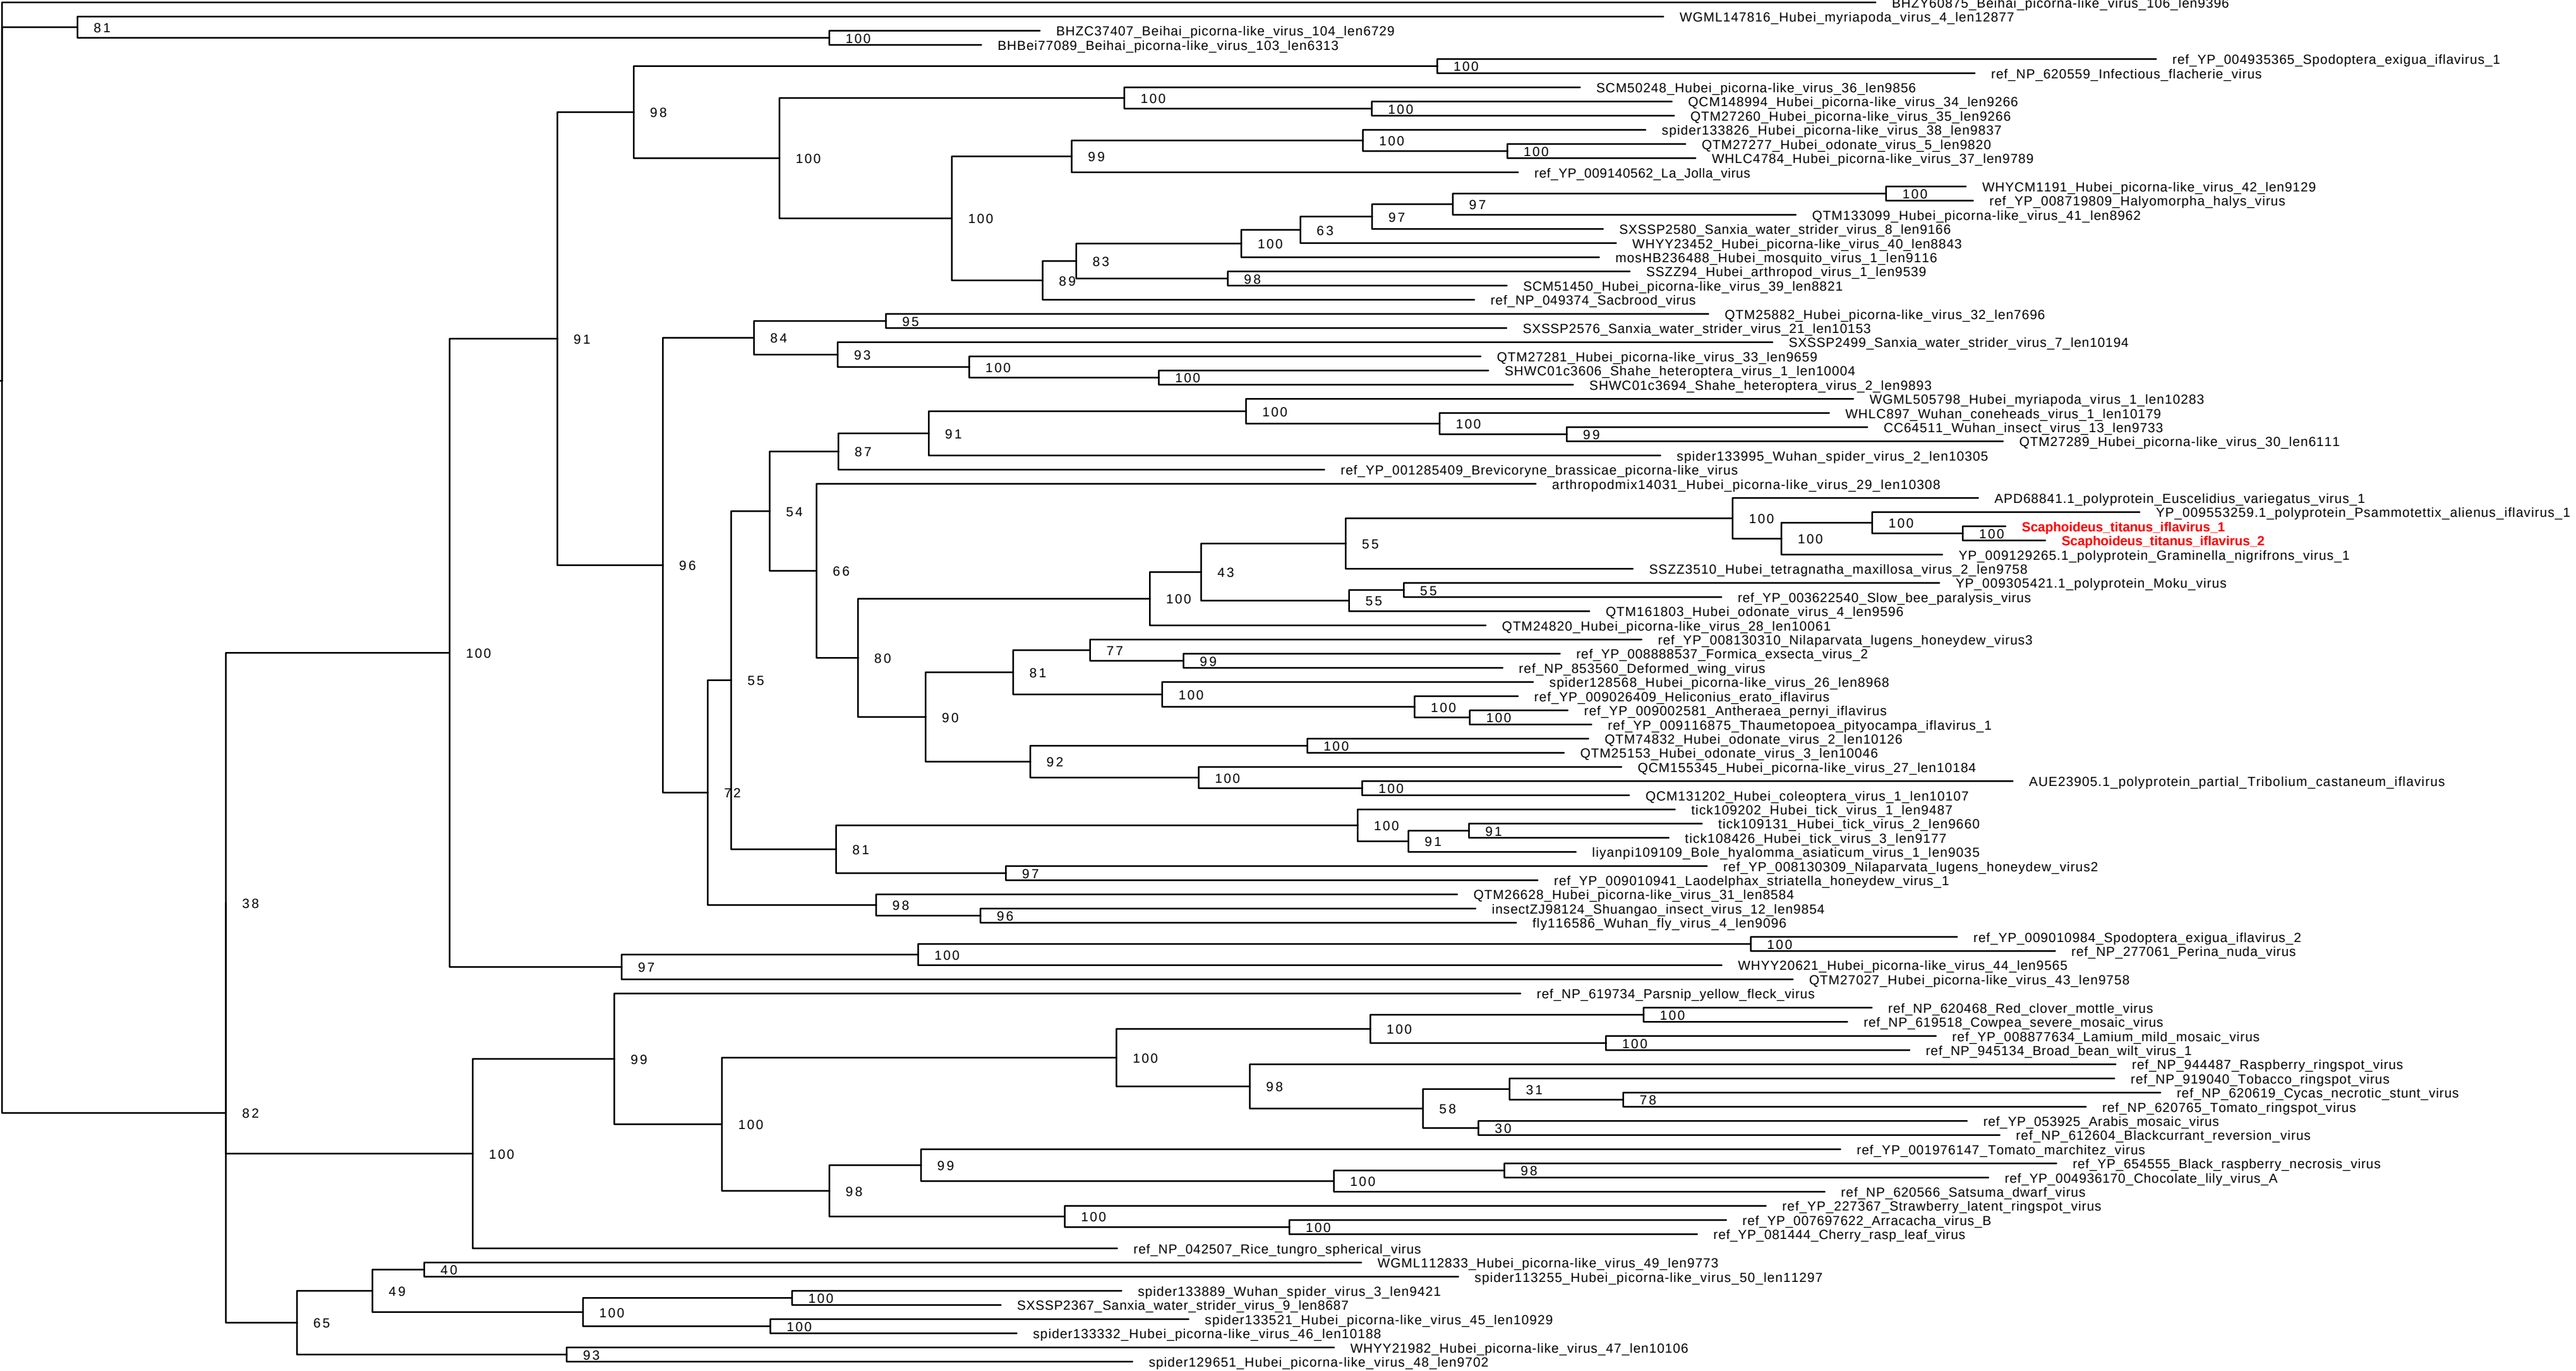

Supplement: s1 [file s1]

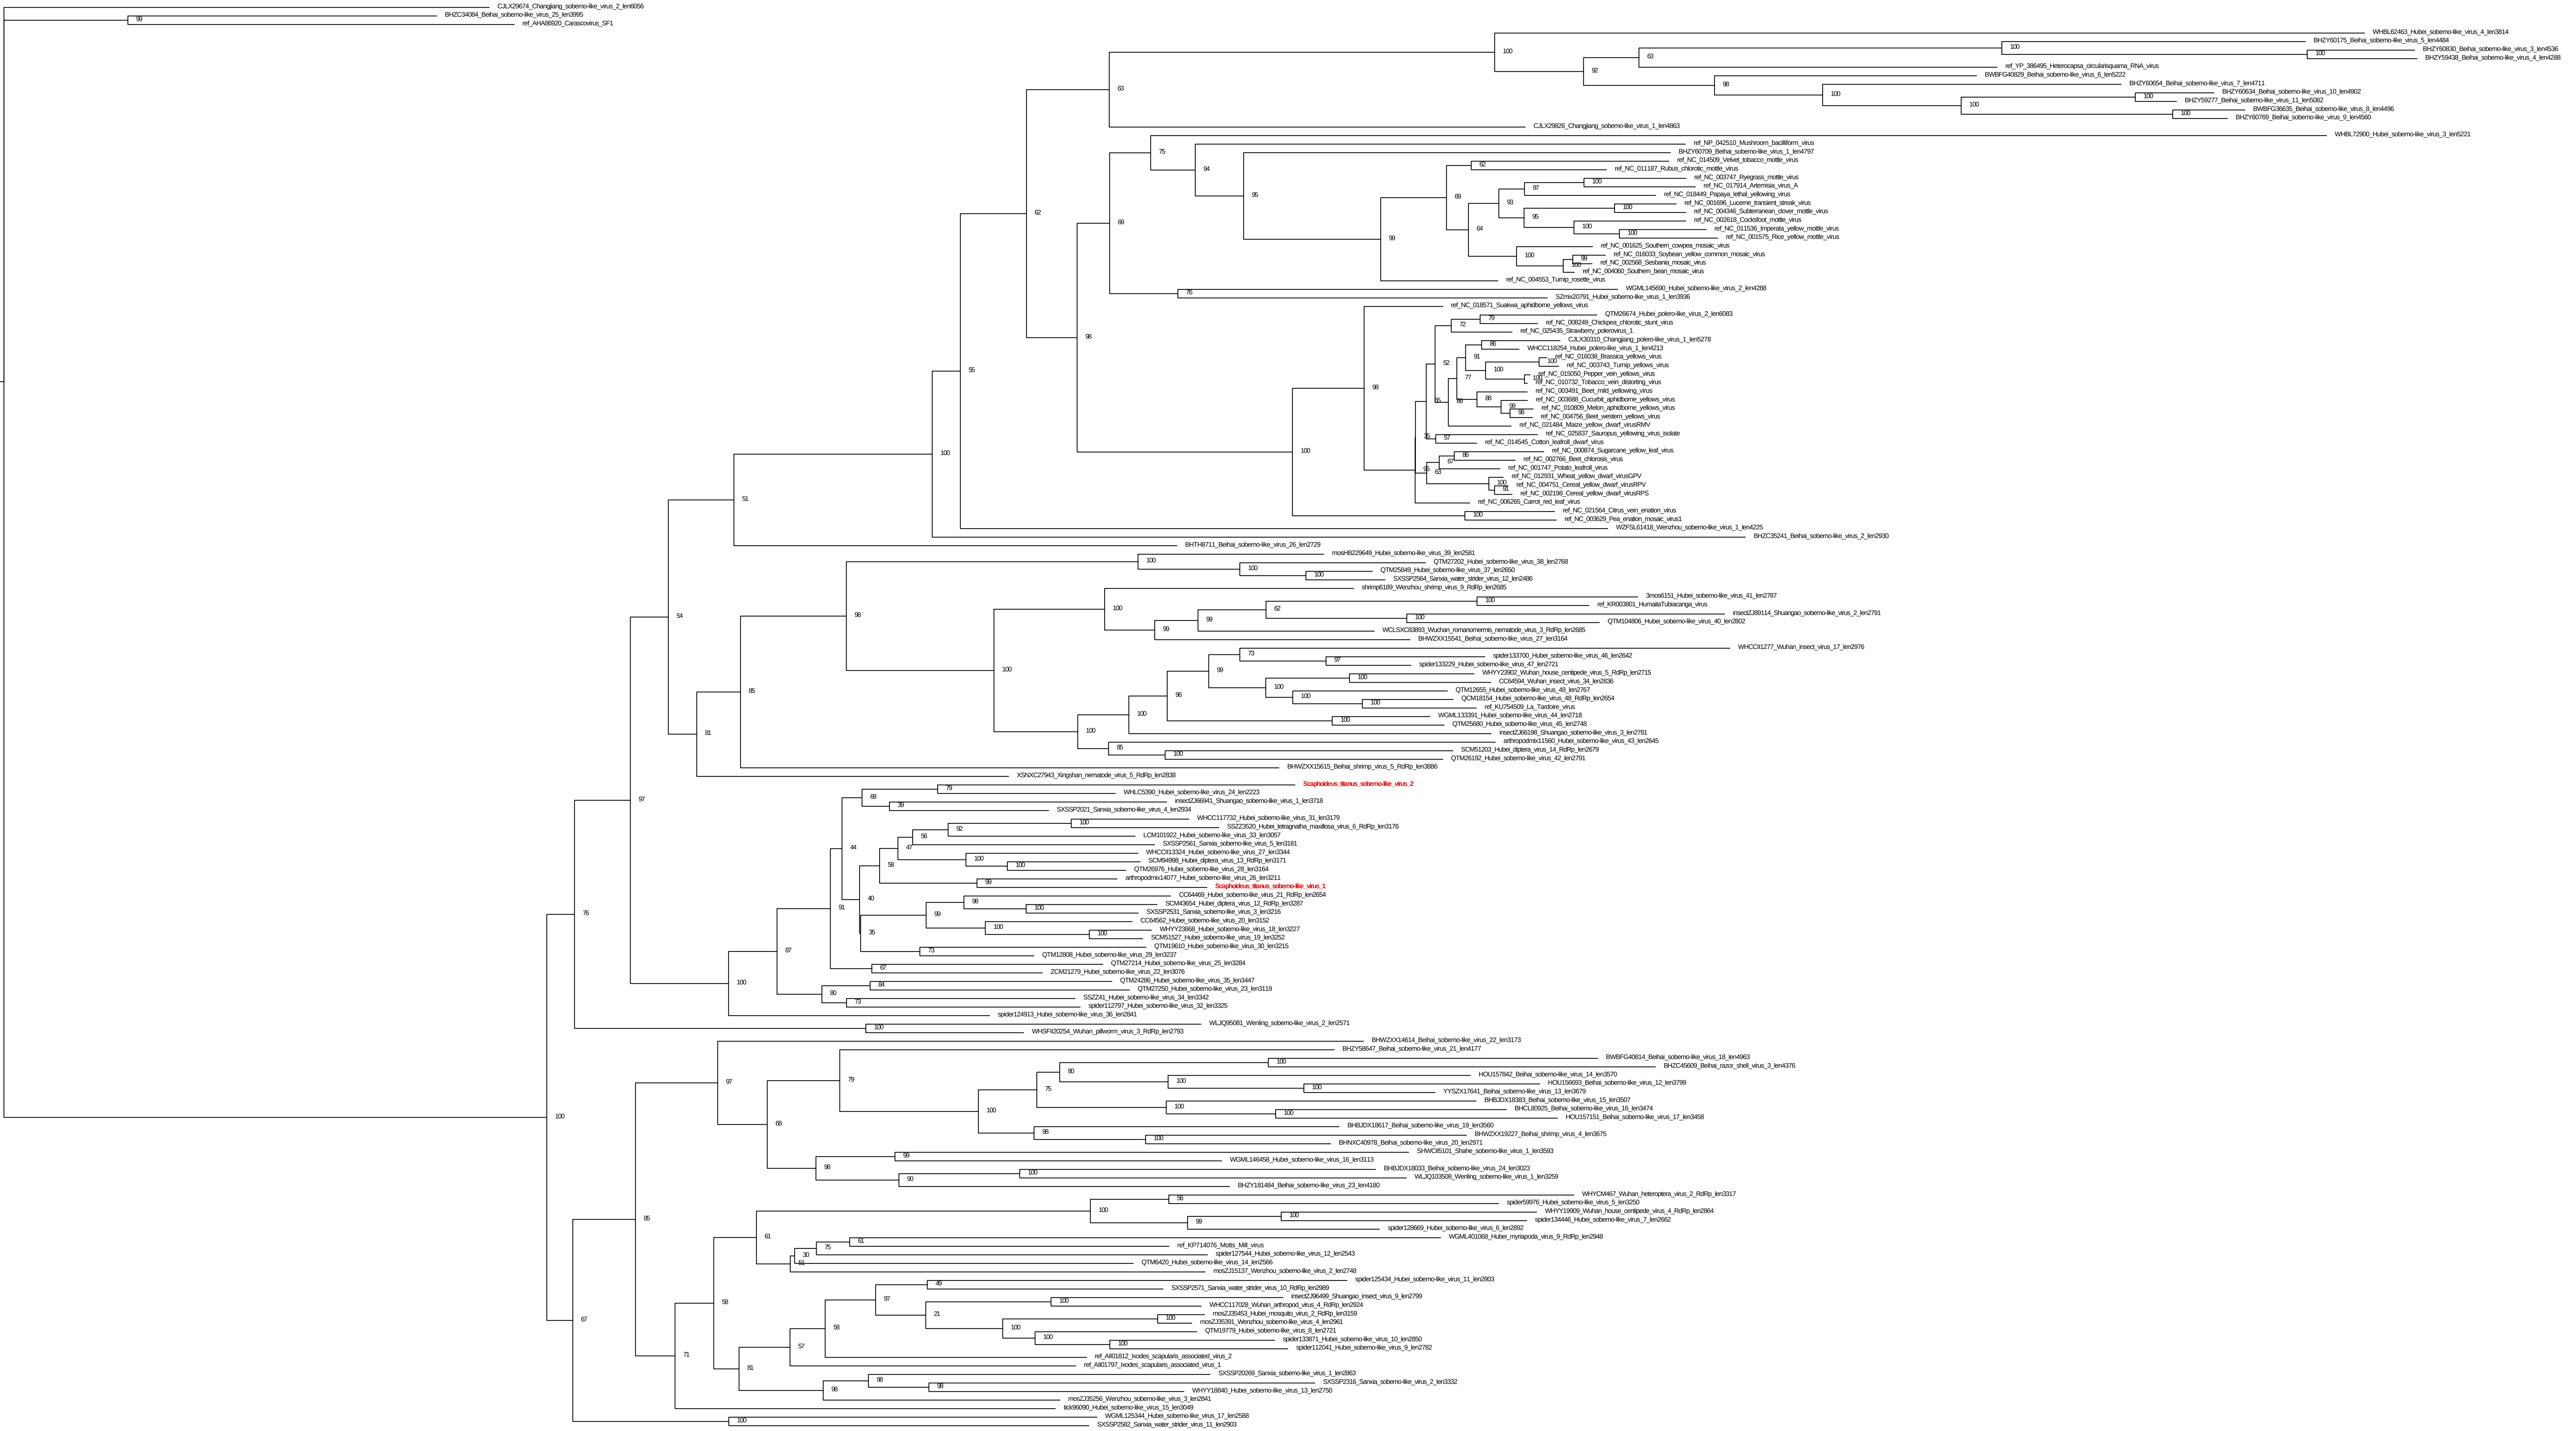

Supplement: s1 [file s1]

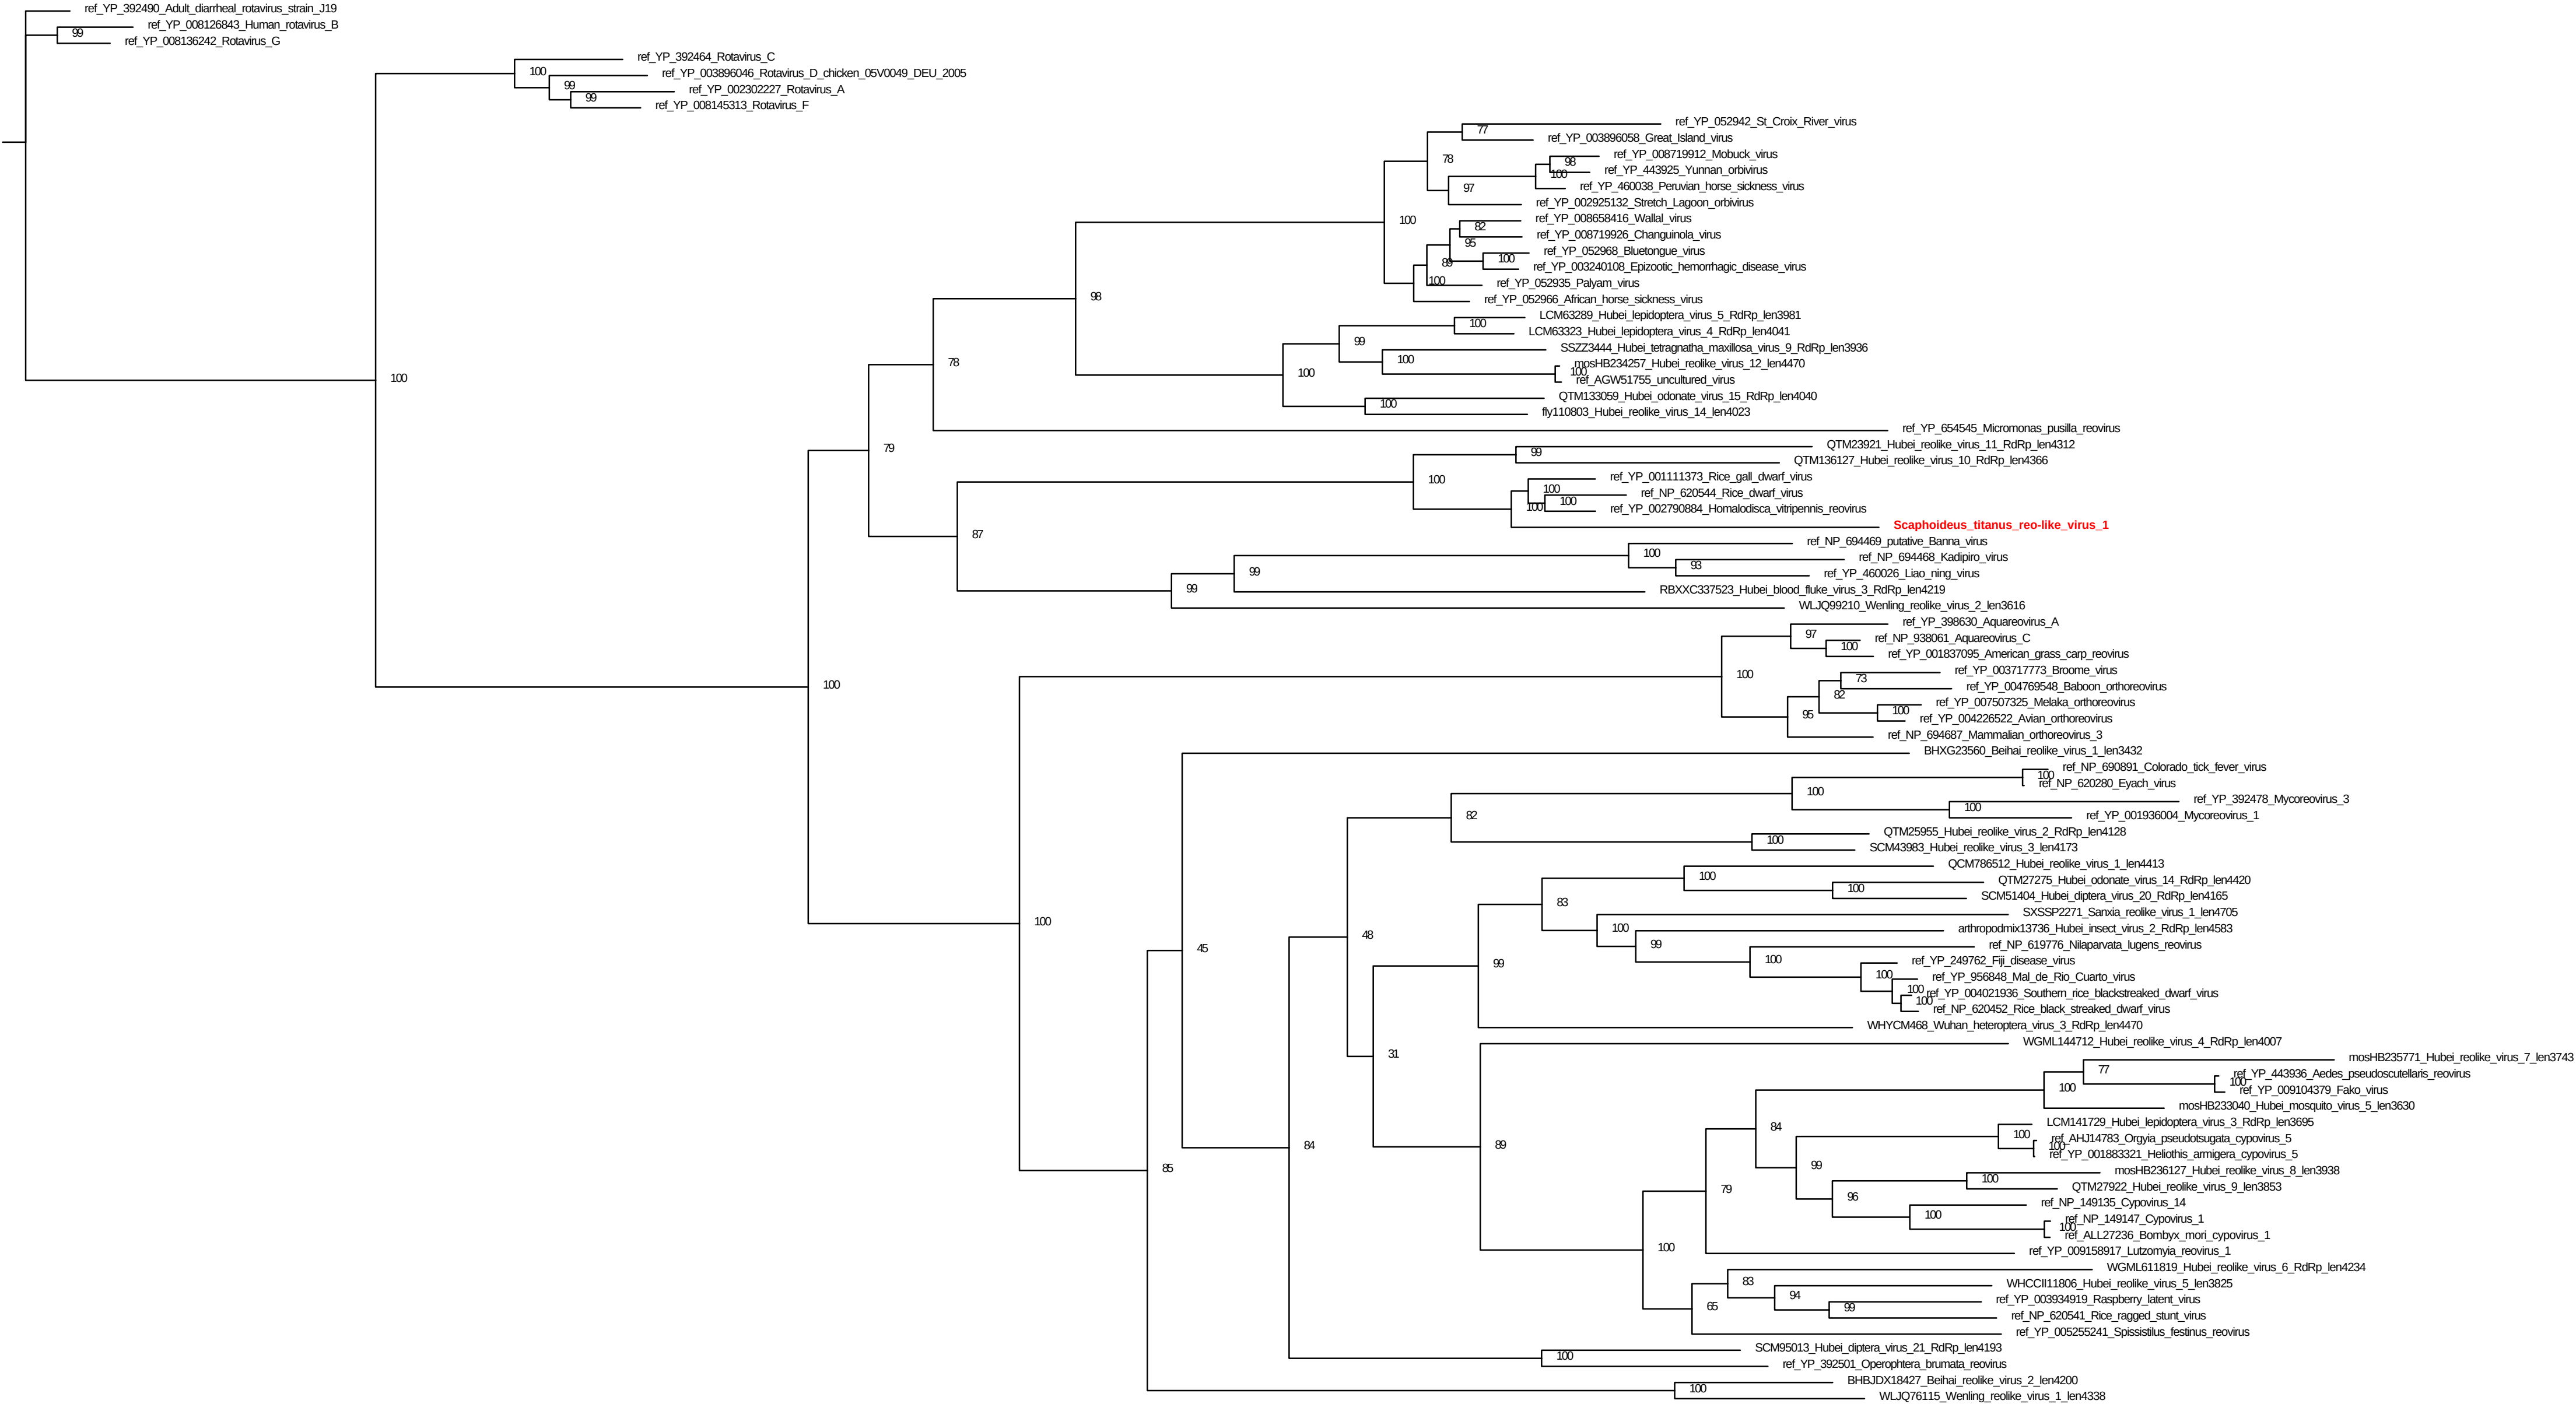

Supplement: s1 [file s1]

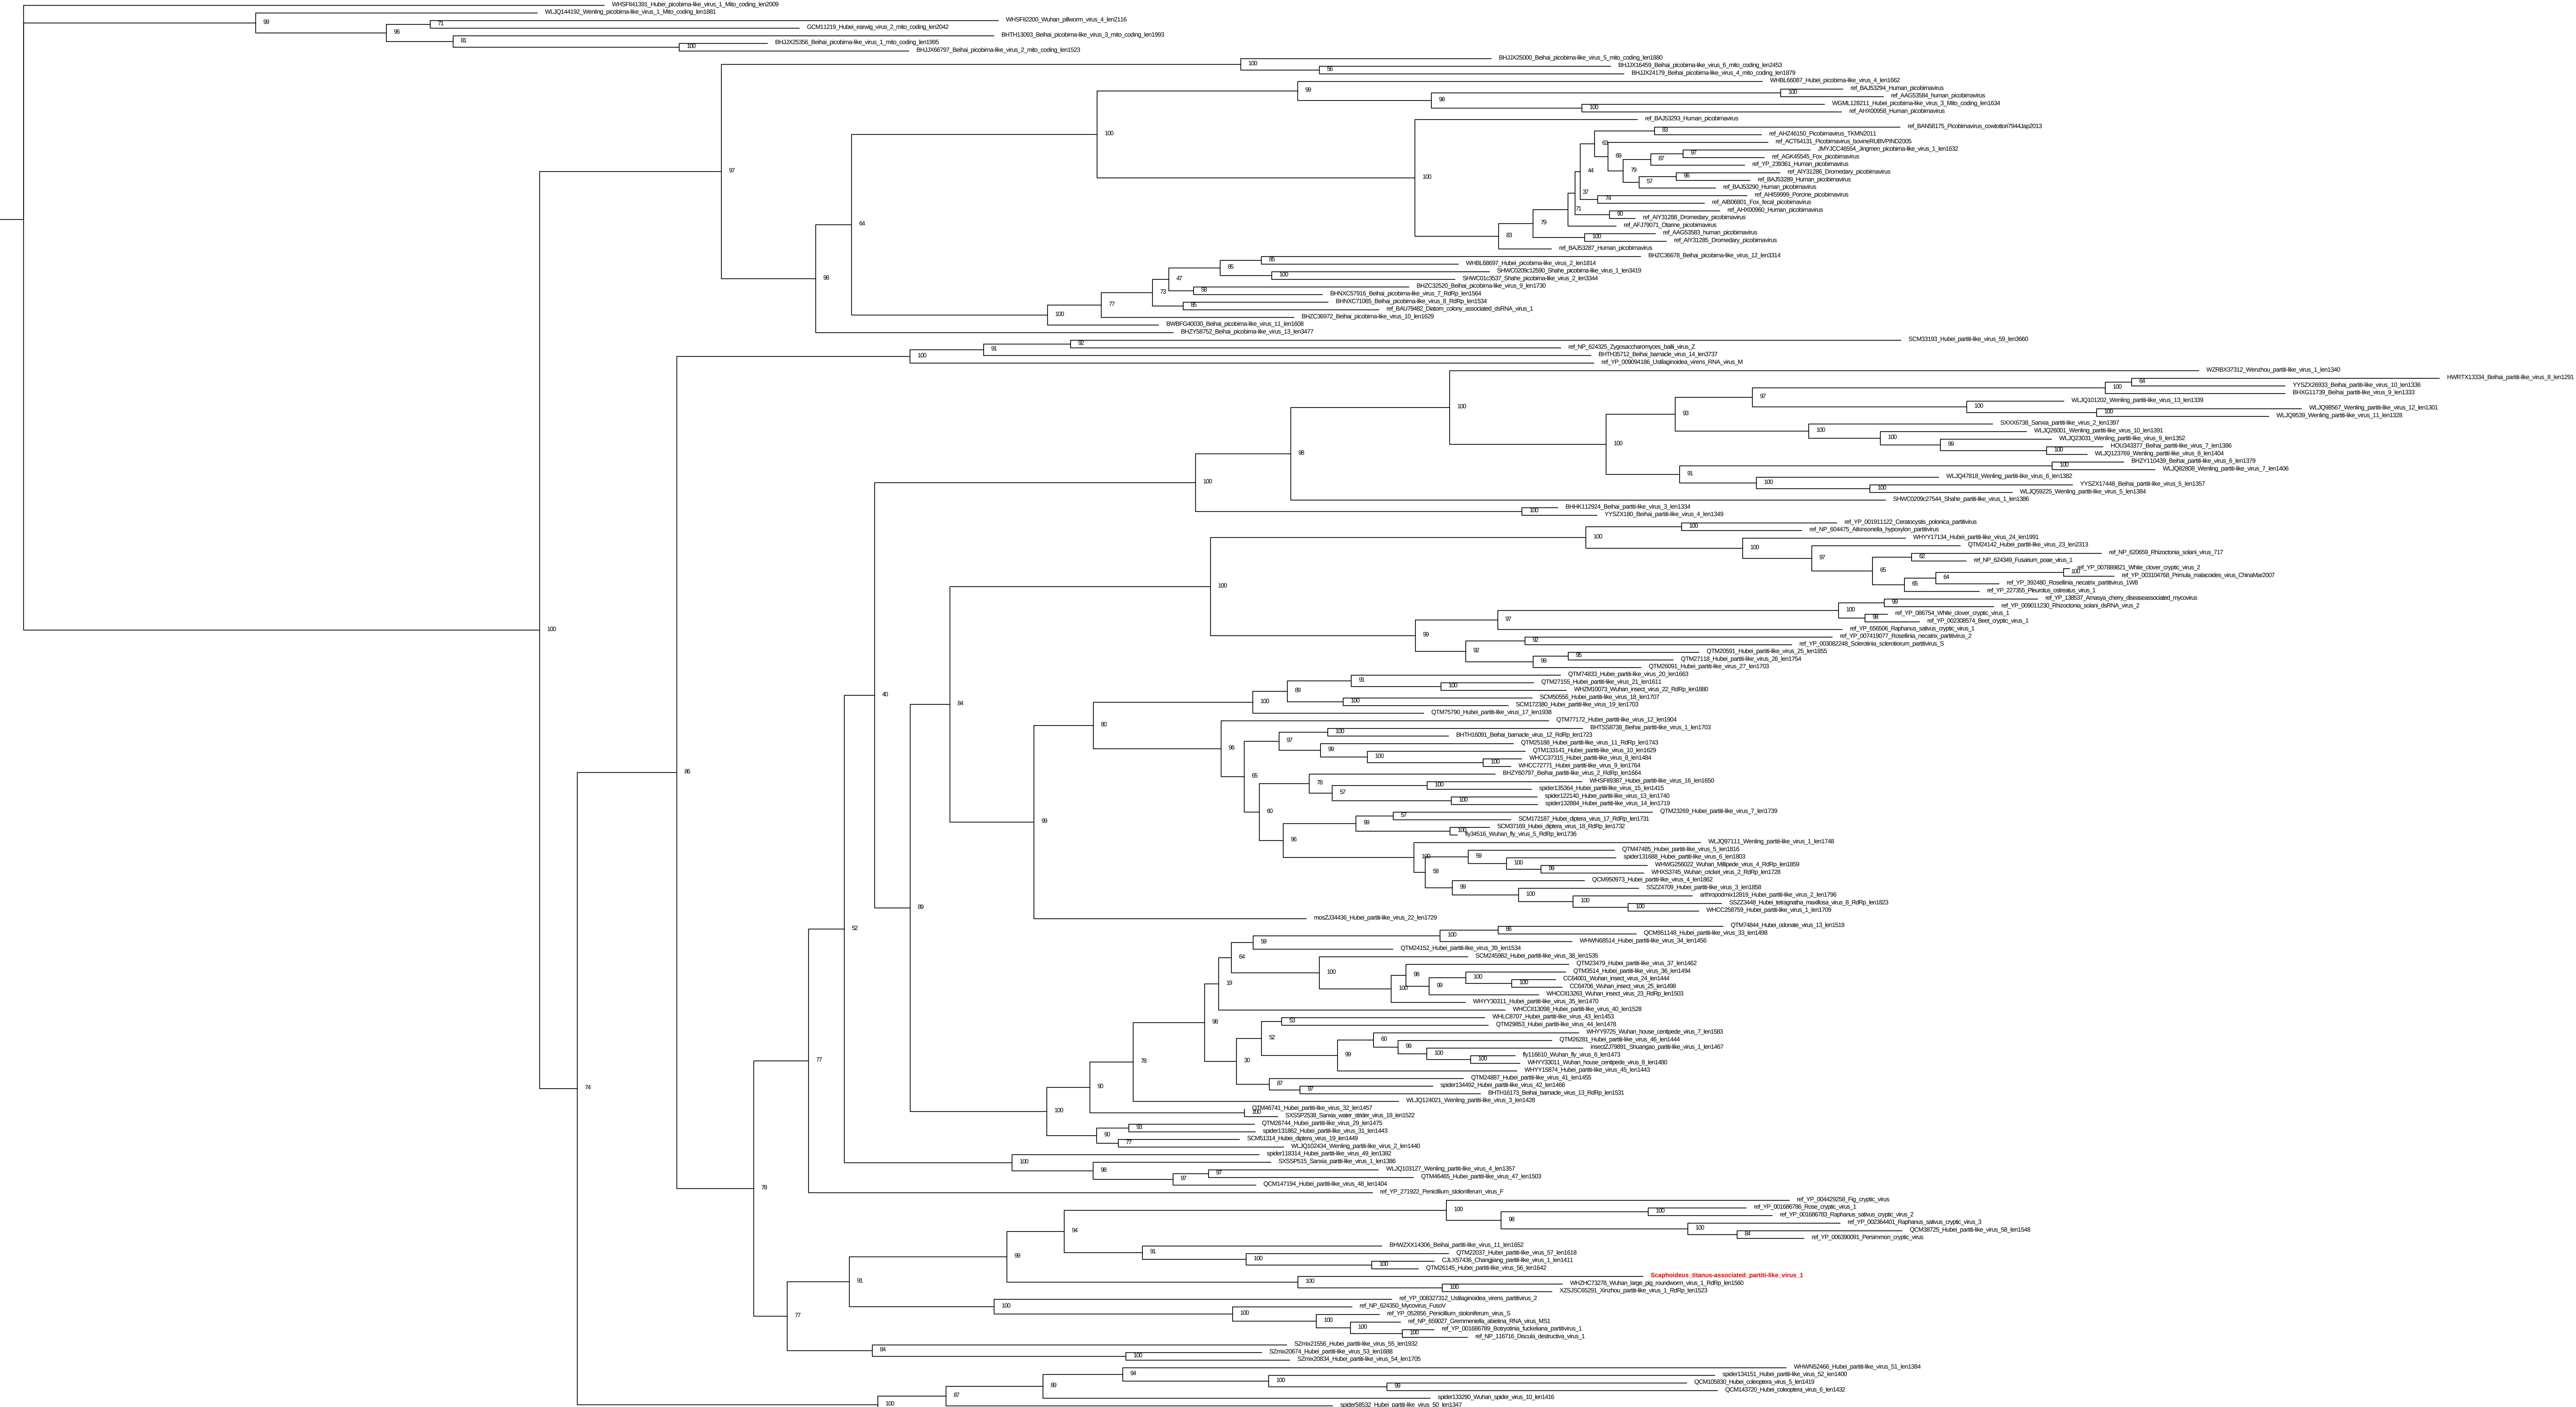

Supplement: s1 [file s1]

**S7**

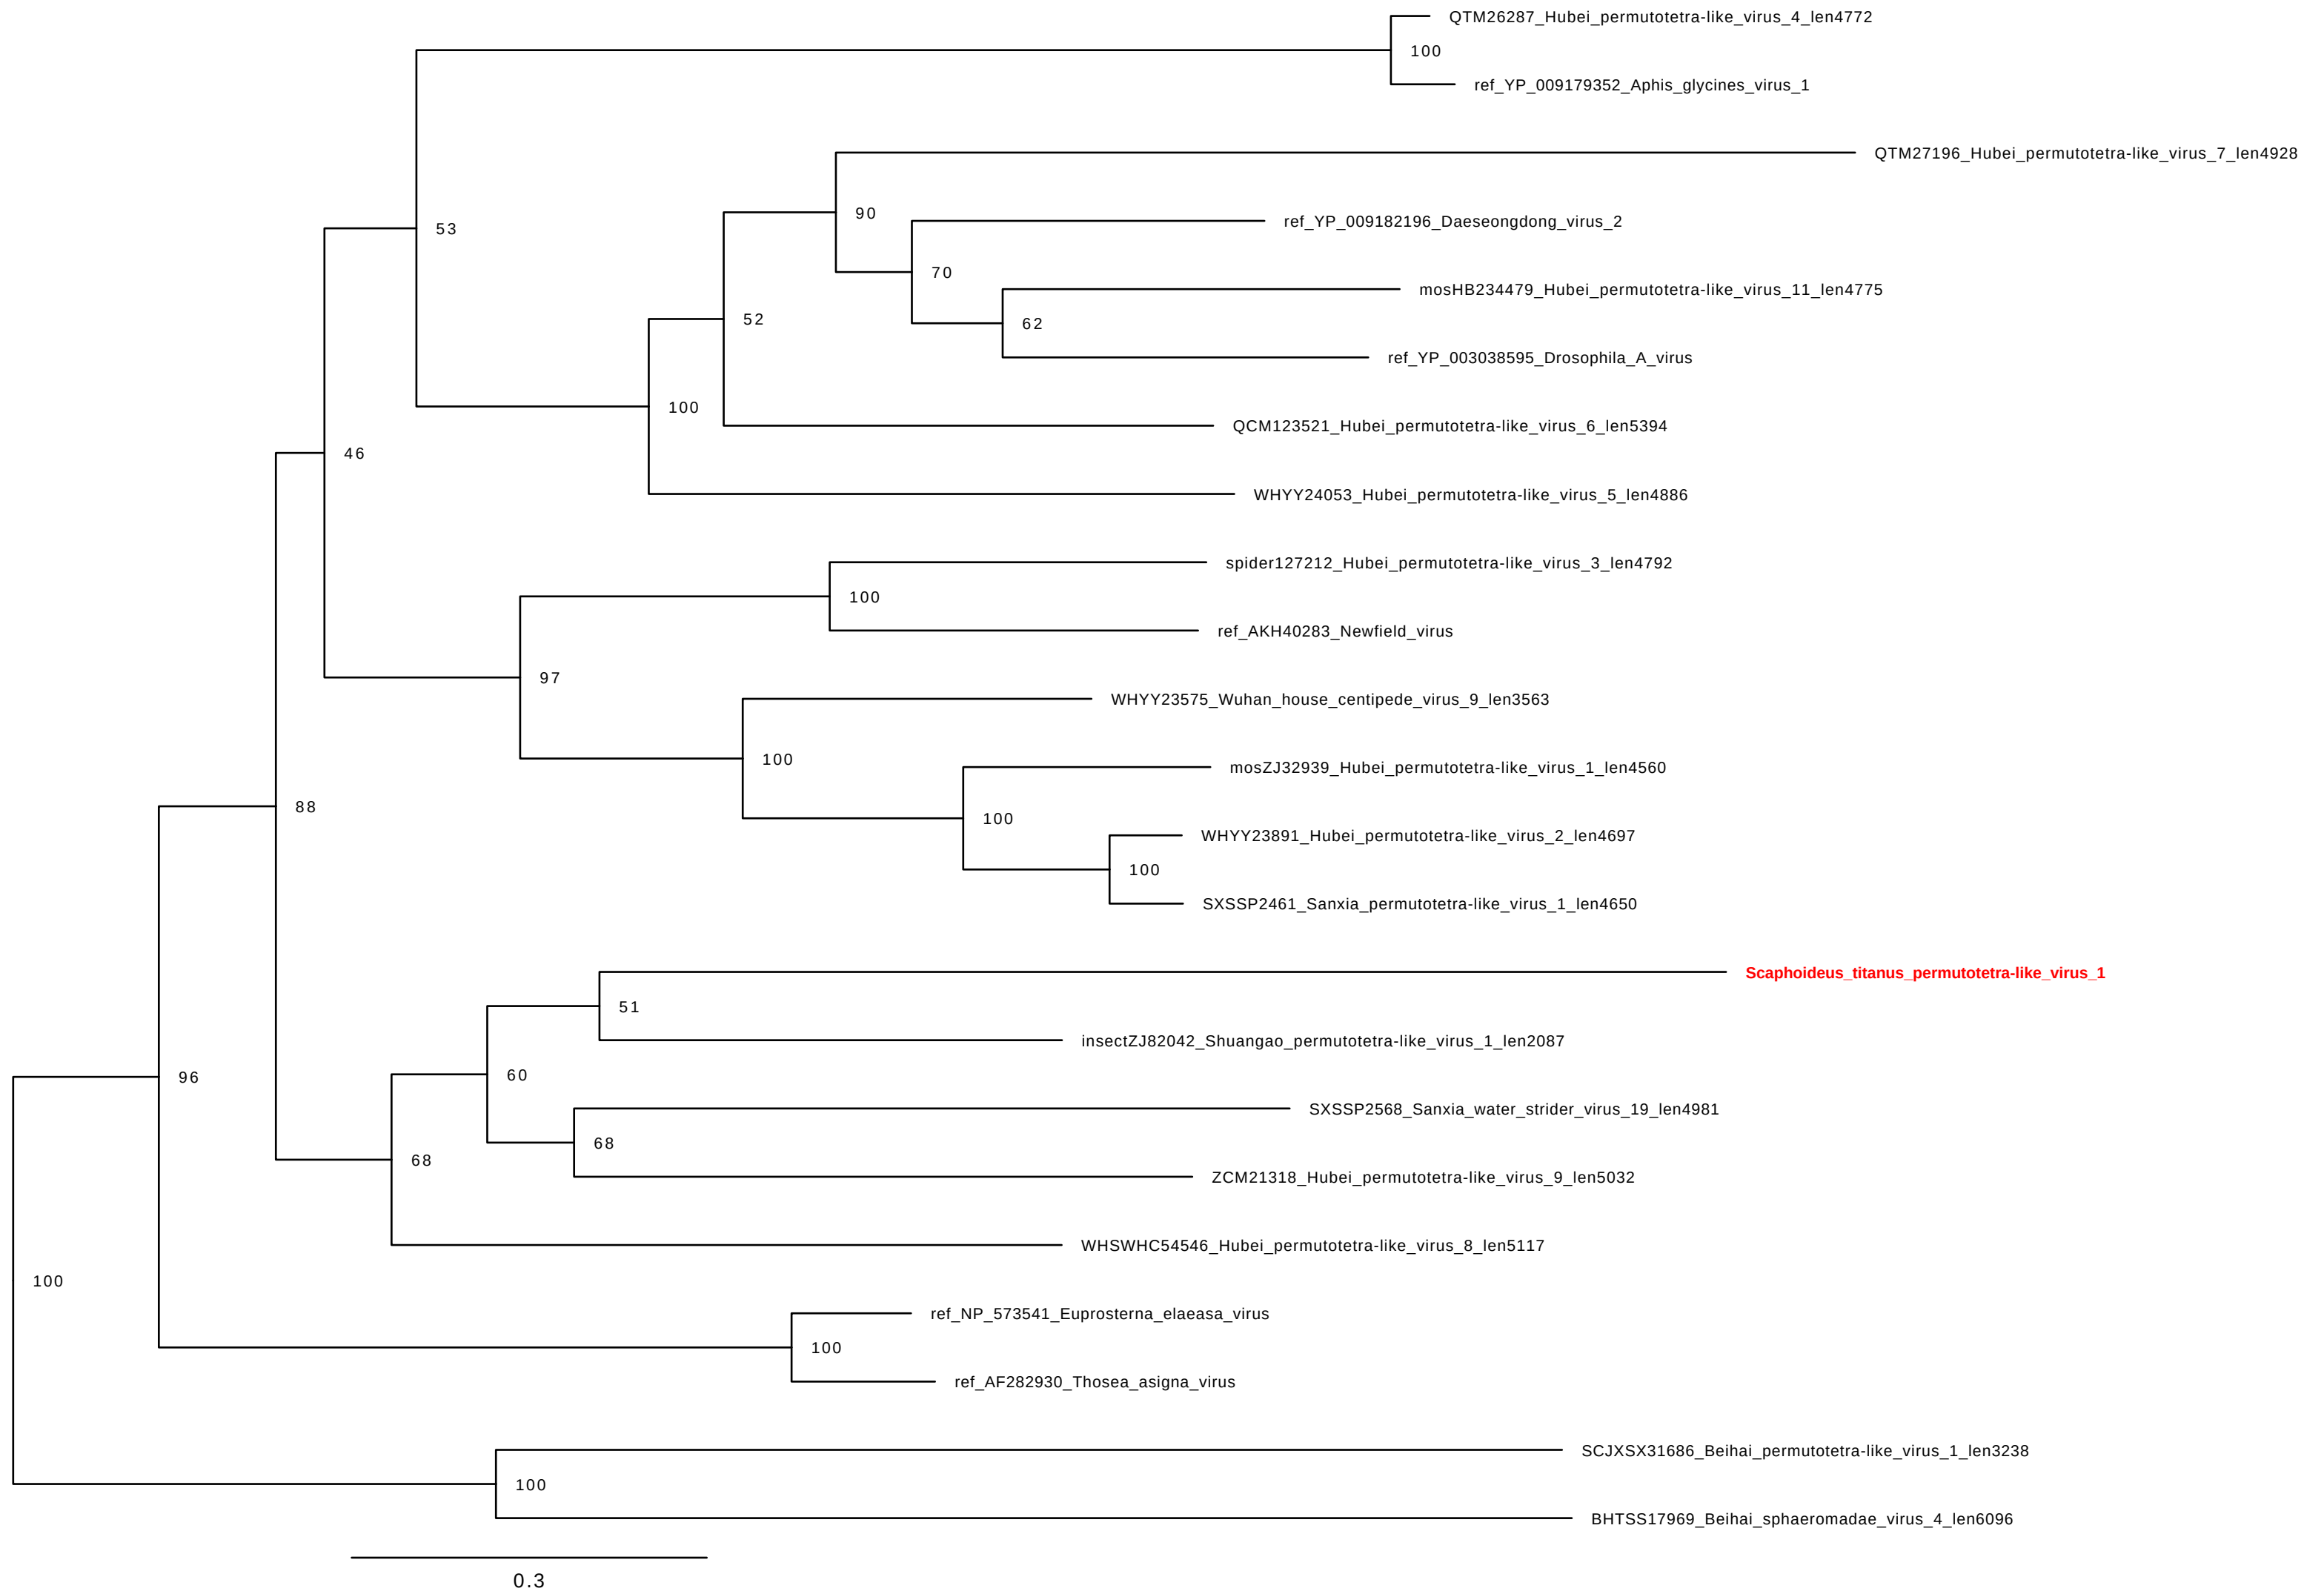

Supplement: s1 [file s1]

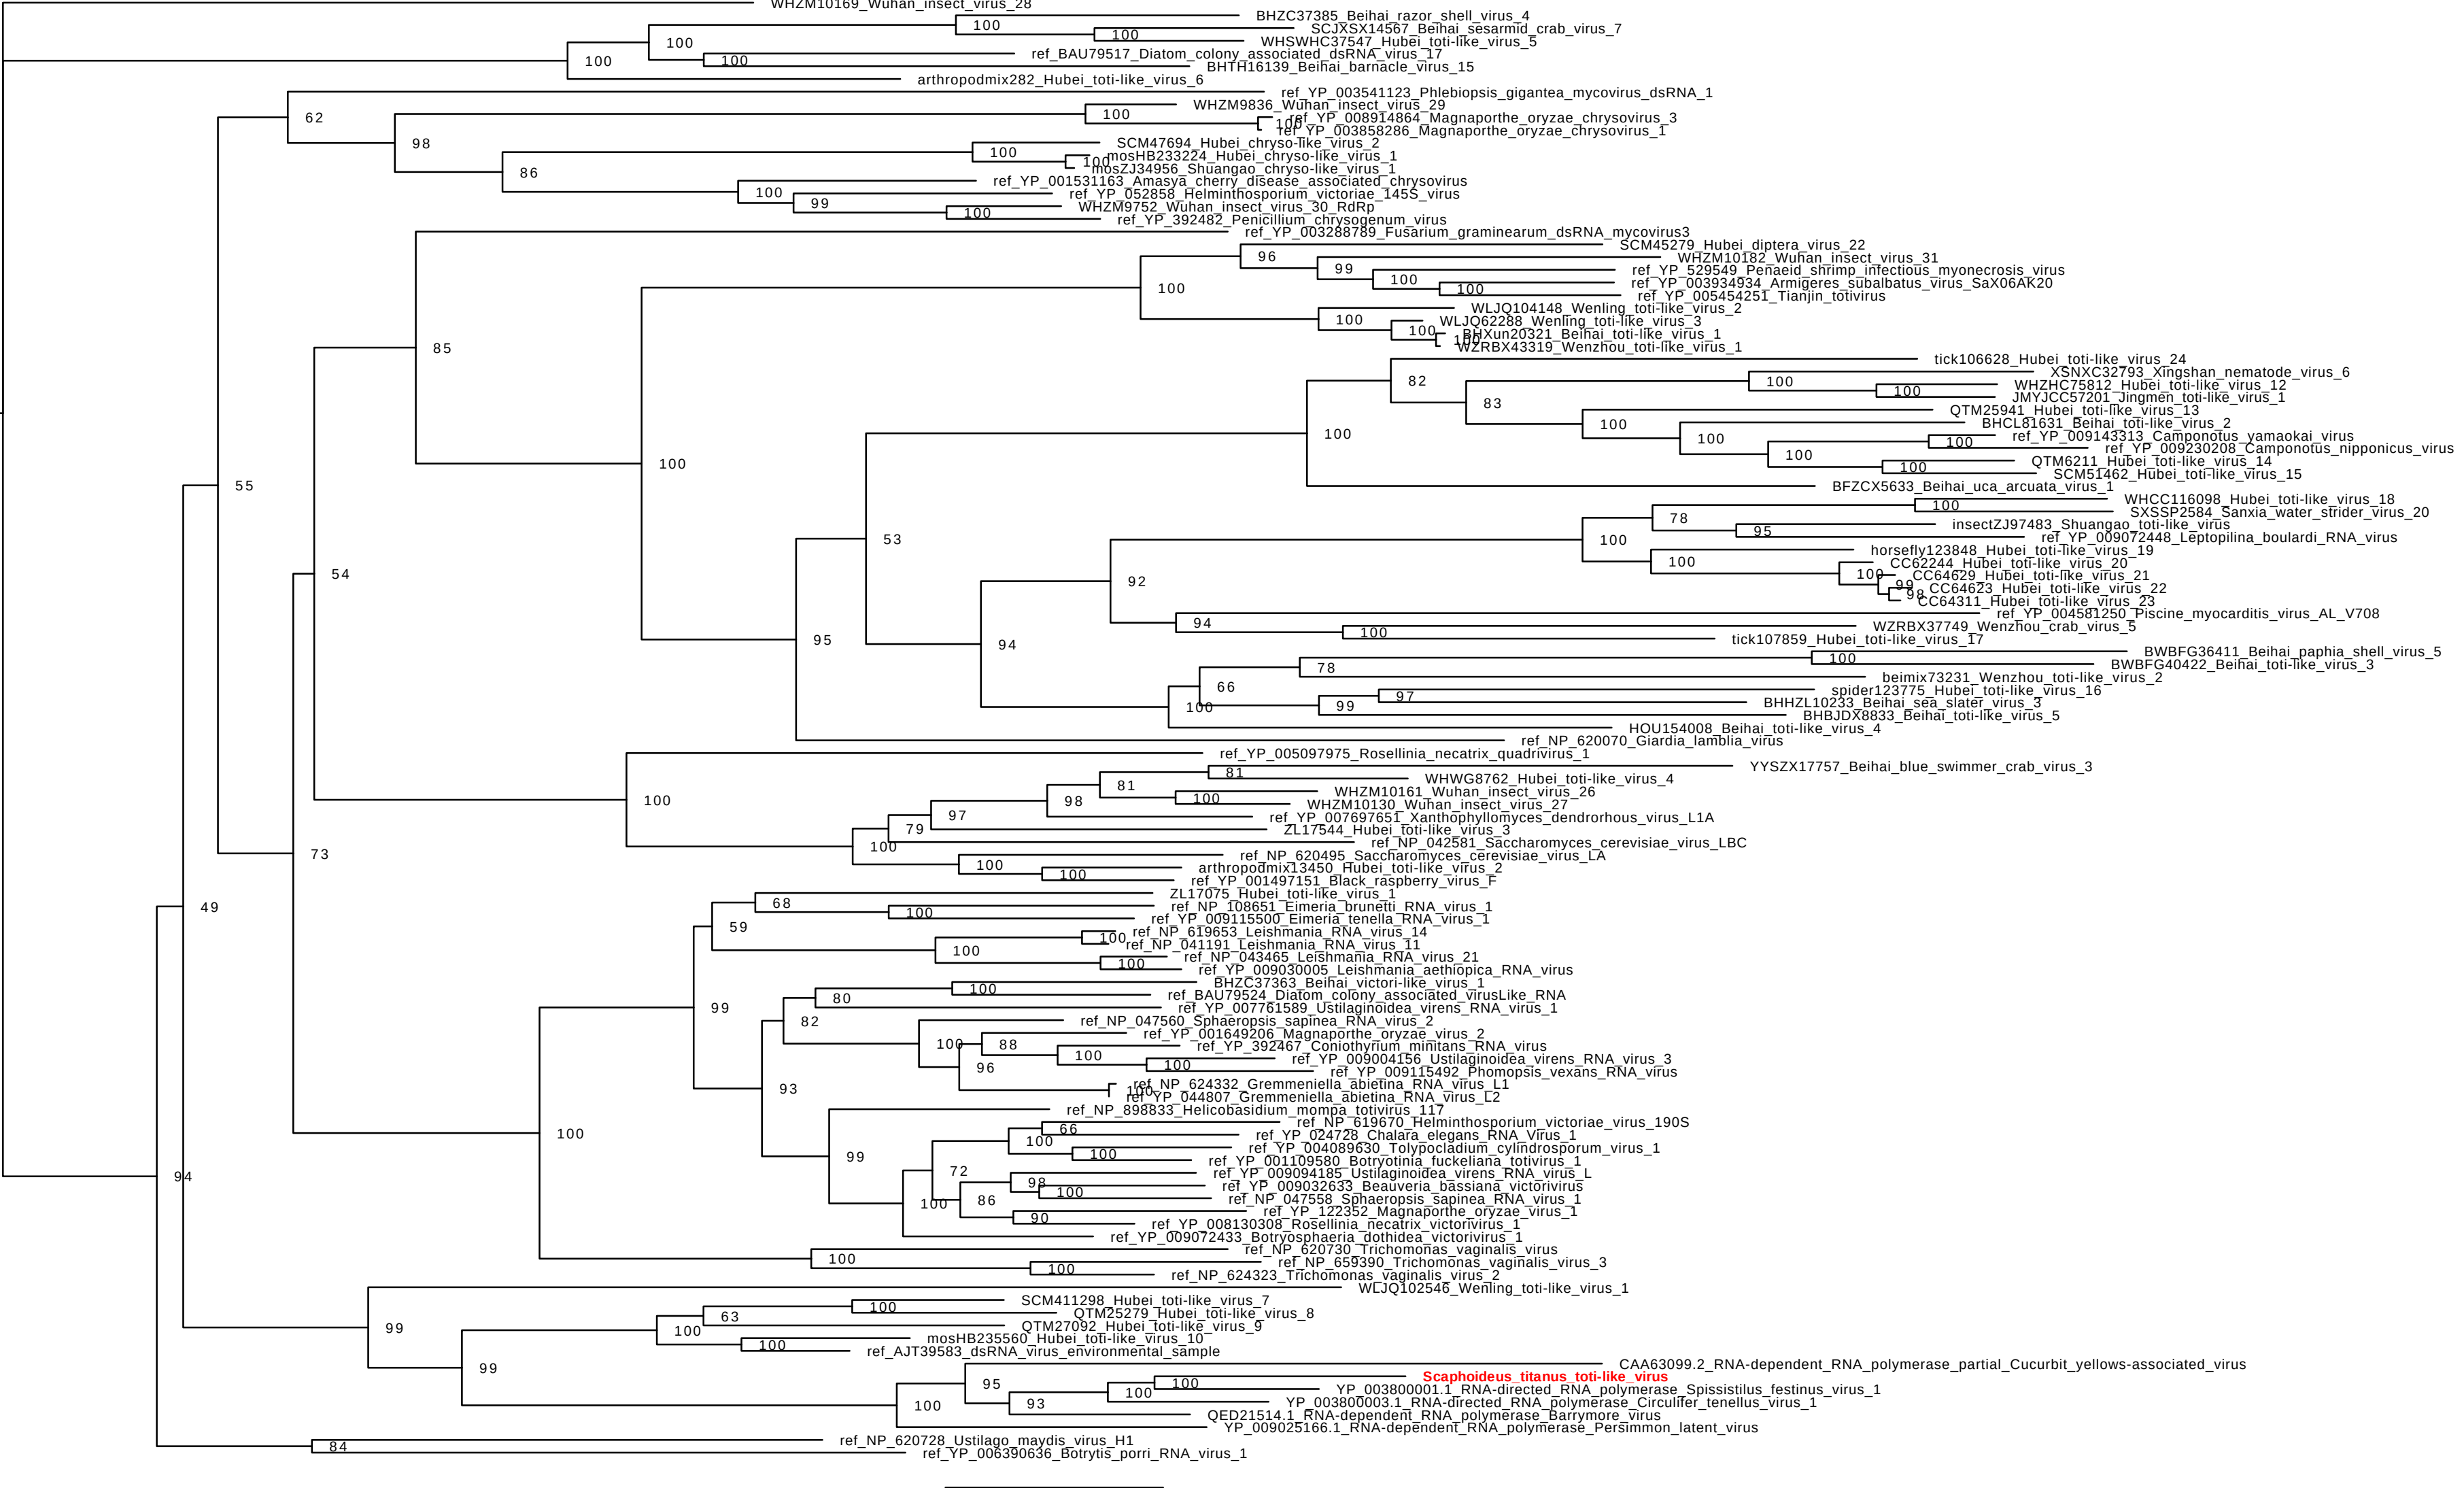

Supplement: s1 [file s1]
